# Supplementary material
Source: Springer Nature journal article supplement (https://www.springermedizin.de/resource/supplementary/12885_2012_3251_MOESM8_ESM.pdf/9463044)

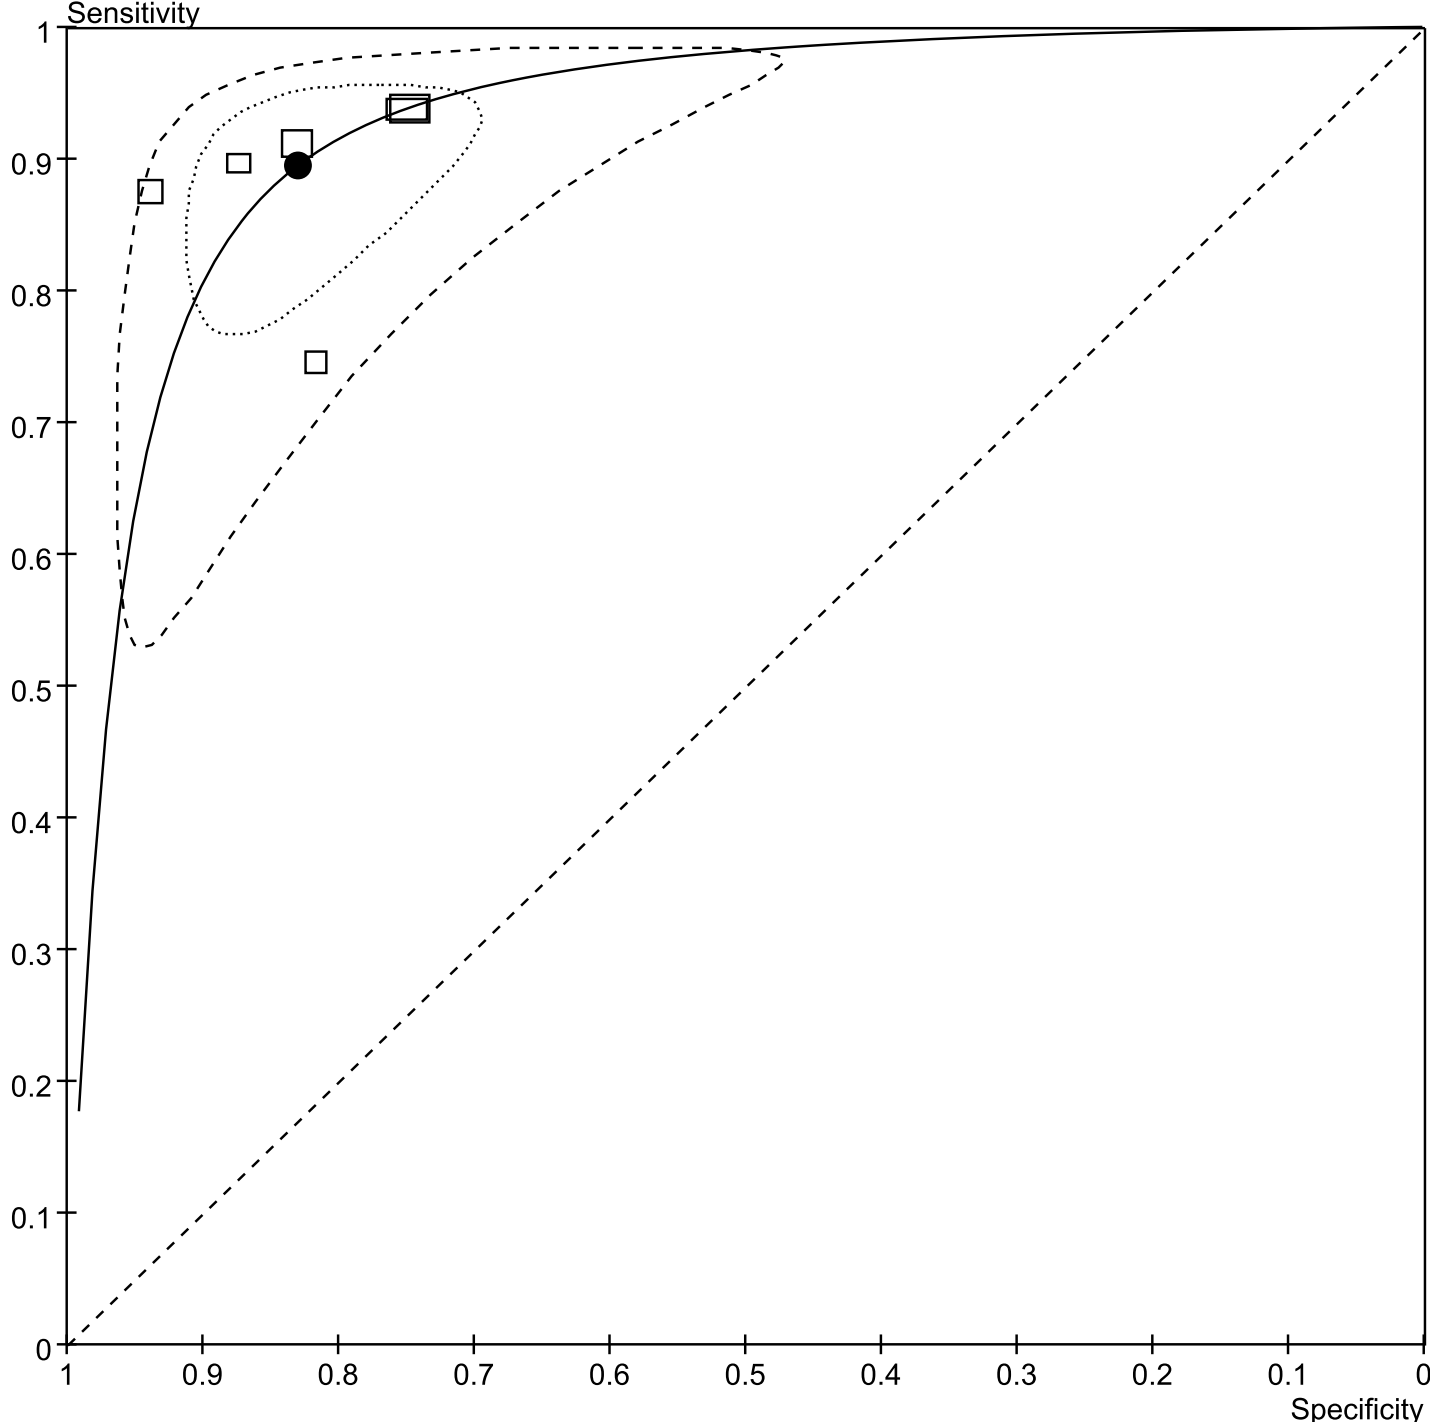

Supplement: MOESM8 [file 9463044]
